## Addition of new neurons and the emergence of a local neural circuit for precise timing

Yevhen Tupikov and Dezhe Z. Jin\*,

Departments of Physics and Center for Neural Engineering, Pennsylvania State University, University Park, PA 16802, USA

\* Corresponding author: Dezhe Z. Jin, dzj2@psu.edu

*Number of pages:* 43

*Number of figures:* 7 main, 4 supplementary

*Number of words in Abstract:* 150

*Number of words in Significance Statement:* 72

*Conflict of Interest:* The authors declare no competing financial interests.

*Acknowledgements:* Research supported by NSF award EF-1822476, the Huck Institutes of the Life Sciences at Pennsylvania State University, and generous donation from Indus Capital in memory of Shunyu Zheng. We thank Ben Scott and Michael Long for useful comments on the manuscript.

## 1 **Abstract**

2 During development, neurons arrive at local brain areas in extended period of time, but how  
3 they form local neural circuits is unknown. Here we computationally model the emergence of  
4 a network for precise timing in the premotor nucleus HVC in songbird. We show that new  
5 motor projection neurons, mostly added to HVC before and during song learning, are recruited  
6 to the end of a growing feedforward network. High spontaneous activity of new neurons makes  
7 them the prime targets for recruitment in a self-organized process via synaptic plasticity. Once  
8 recruited, the new neurons fire readily at precise times, and they become mature. Neurons that  
9 are not recruited become silent and replaced by new immature neurons. Our model incorporates  
10 realistic HVC features such as interneurons, spatial distributions of neurons, and distributed  
11 axonal delays. The model predicts that the birth order of the projection neurons correlates with  
12 their burst timing during the song.

## 13 **Significance Statement**

14 Functions of local neural circuits depend on their specific network structures, but how the net-  
15 works are wired is unknown. We show that such structures can emerge during development  
16 through a self-organized process, during which the network is wired by neuron-by-neuron re-  
17 cruitment. This growth is facilitated by steady supply of immature neurons, which are highly  
18 excitable and plastic. We suggest that neuron maturation dynamics is an integral part of con-  
19 structing local neural circuits.

## 20 Introduction

21 During development, the birth order of neurons plays a critical role in constructing the brain's  
22 large-scale structures. In mammalian cortex, neurons that are destined to the deep cortical  
23 layers are born earlier than those to the superficial layers [1, 2]. In rodent hippocampus, earlier  
24 born neurons and late born neurons form distinctive parallel circuits through the hippocampal  
25 pathway [3]. However, whether birth order is also important in constructing microcircuits in  
26 local brain areas is unknown [4]. The premotor nucleus HVC (proper name) of the zebra finch  
27 provides an excellent opportunity to investigate this issue.

28 HVC is a premotor nucleus that drives singing of the courtship song in the zebra finch [5, 6].  
29 An adult zebra finch sings repetitions of a motif consisting of fixed sequence of syllables [7].  
30 Excitatory HVC neurons that project to the downstream premotor area RA (robust nucleus of  
31 the arcopallium) encode the timing of acoustic features of the song [8]. Each  $HVC_{RA}$  neuron  
32 bursts once during the motif [8, 9]. As a population,  $HVC_{RA}$  neurons sequentially burst through  
33 the entire motif [10, 11].

34 There is strong evidence that the sequential bursting of  $HVC_{RA}$  neurons is generated within  
35 HVC [12, 9, 13, 14]. Moreover,  $HVC_{RA}$  neurons most likely form a feedforward synaptic chain  
36 network, which supports propagation of burst spikes [15, 9]. Such a microcircuit in HVC acts as  
37 an infrastructure for subsequent learning of the song, during which the connections from HVC to  
38 RA are established through reinforcement learning such that appropriate sounds are produced  
39 at appropriate time points [16, 17, 18, 19].

40  $HVC_{RA}$  neurons are born and added to HVC mostly after hatching [20, 21, 22, 23]. In the  
41 zebra finch, the number of  $HVC_{RA}$  neurons almost doubles from 20 to 50 days post hatch [24],  
42 which coincides with the period of subsong and early plastic song that precede the formation of  
43 song motif. This is unlike two other major neuron types in HVC: most GABA ( $\gamma$ -Aminobutyric  
44 acid)-ergic interneurons ( $HVC_{INT}$  neurons) and neurons that project to area X ( $HVC_X$  neurons)  
45 are already in HVC before hatching [21] (but see [22]). Therefore, throughout song learning  
46  $HVC_{RA}$  neurons have a wide range of birthdates.

47 Previous computational models [25, 26] and single unit recordings in juvenile zebra finches  
48 [27] have suggested that the feedforward synaptic chain network in HVC forms through growth  
49 by gradual recruitment of  $HVC_{RA}$  neurons to the network. However, these earlier works did not  
50 address whether the ongoing neurogenesis throughout the song learning period plays any role.  
51 Indeed, although neurogenesis in HVC has been observed for decades, its role for song learning  
52 in zebra finch has remained a mystery [28, 23].

53 In this paper, we propose that constant supply of newborn  $HVC_{RA}$  neurons plays a crucial  
54 role in building the synaptic chain network in HVC. We investigate this hypothesis through a  
55 computational model that builds on the previous models of network growth in HVC [25, 26].  
56 Unlike these earlier models, our model incorporates more biologically realistic features, including  
57 explicit incorporation of  $HVC_{INT}$  neurons rather than simplifying inhibitory actions as idealized  
58 global inhibition between  $HVC_{RA}$  neurons; implementation of axonal delays between  $HVC_{RA}$   
59 neurons, which has shown to be substantial and is important for determining the connectivity  
60 structure of the synaptic chain network [29]; and spatial structure of  $HVC_{RA}$  connectivity, which  
61 has been recently measured in zebra finch [14]. Most importantly, the maturation dynamics of  
62  $HVC_{RA}$  neurons is modeled.

63 Newly born neurons have a number of properties that distinguish them from mature neurons.  
64 Immature neurons in rodents [30, 31, 32] and in songbird HVC [33] are more excitable; and in  
65 rodents, they are more amenable to synaptic plasticity [34]. In adult rodent hippocampus, these  
66 properties make adult-born dentate gyrus neurons more likely to participate in new memory  
67 formation than mature neurons [35]. We propose that newly born neurons in HVC similarly  
68 facilitate the growth of synaptic chain network. In our model, the synaptic chain network grows  
69 through spontaneous activity of neurons. Due to their high excitability, we propose that newly  
70 added  $HVC_{RA}$  neurons are preferentially recruited at the growth edge of the network. After  
71 incorporation into the network, we suggest that these neurons mature fast due to consistent  
72 activations and form a new edge of growth that leads to recruitment of a new cohort of immature  
73 neurons. This process iterates, creating a synaptic chain network that supports precise bursts

74 of  $HVC_{RA}$  neurons. Therefore, we predict that timing of bursts correlates with the birth order  
75 of  $HVC_{RA}$  neurons during development.

76 We show evidence that maturity of  $HVC_{RA}$  neurons correlates with timing by reanalyzing the  
77 data from the previous experiments on juvenile zebra finch [27]. We also show that our model  
78 creates the observed spatial distribution profile for the connections between  $HVC_{RA}$  neurons  
79 [14]. With a wide delay distribution between these connections, as observed by experiments  
80 [29], our model produces a robust polychronous chain network with continuous and precise time  
81 representation, which is recently proposed to be the structure of the synaptic chain network in  
82 HVC [29]. Our model also predicts that  $HVC_{RA}$  neurons in the growing chain network receive  
83 less forward inhibition from the  $HVC_{RA}$  neurons that drive them.

## 84 Results

### 85 Maturation dynamics of $HVC_{RA}$ neurons

86 To investigate the possible role of immature  $HVC_{RA}$  neurons in wiring the HVC network, we cre-  
87 ated a computational model of the maturation dynamics of these neurons. We modeled  $HVC_{RA}$   
88 neurons using two-compartmental Hodgkin-Huxley neurons with soma and dendrite (Fig. 1a),  
89 following previous models [15, 36, 9]. The somatic compartment contains sodium, delayed-  
90 rectifying potassium, and low-threshold potassium currents for generating sodium spikes. The  
91 dendritic compartment contains calcium and calcium-activated potassium currents that, in ma-  
92 ture neurons, can generate dendritic spike that drives stereotypical tight bursts of sodium spikes  
93 in the somatic compartment.

94 This model is modified for immature  $HVC_{RA}$  neurons. The resting membrane potential is set  
95 higher by 25 mV, since it is generally observed in rodents [31] and in HVC [33] that the resting  
96 membrane potentials of immature neurons are higher than that of mature neurons. The calcium  
97 conductance is set to zero to reflect “weak” dendritic compartment in immature neurons. Hence,  
98 immature neuron is incapable of generating tight bursts (Fig. 1b).

99 During maturation, the resting potential is gradually decreased and the calcium conductance  
100 is gradually increased in the dendritic compartment, eventually reaching the values for mature  
101 neurons. Dendritic calcium spike and tight burst of somatic sodium spikes gradually emerges  
102 during this process (Fig. 1b). The time course of maturation is age and activity dependent  
103 in our model (Fig. 1c). Due to elevated resting potential and noise, immature neurons spike  
104 spontaneously at  $\sim 0.6$  Hz. A spontaneously active immature neuron matures following a time  
105 schedule, according to which both the resting membrane potential and the calcium conductance  
106 exponentially approach their mature values with time constant of 50,000 s. When a neuron is  
107 recruited into the network and spikes reliably, the maturation progressed with a faster rate, with  
108 time constant set to 500 s. In our model, spontaneous activity decreases with age, practically  
109 disappearing in adult neurons (Supplementary Fig. 8). Therefore, neurons that did not get  
110 recruited to the network gradually become silent. The silent neurons were replaced by new  
111 immature neurons in our model to mimic the continuous neurogenesis process.

## 112 **Initial HVC network**

113 Among the three major HVC neuron types,  $HVC_x$  neurons have shown to have minimal impact  
114 on song production in a laser ablation study [37]. Furthermore, analysis of HVC connectivity  
115 suggests that  $HVC_{RA}$  neurons excite  $HVC_x$  neurons, but  $HVC_x$  neurons rarely connect back to  
116  $HVC_{RA}$  neurons [38]. These results suggest that  $HVC_x$  are not necessary for song production.  
117 Therefore, we did not include  $HVC_x$  neurons in our model.

118 HVC of the zebra finch is roughly an ellipsoidal structure with axial dimensions 2000  $\mu\text{m}$ , 500  
119  $\mu\text{m}$  and 500  $\mu\text{m}$  [14]. There are approximately 20,000 song-related  $HVC_{RA}$  neurons and 5,500  
120  $HVC_{INT}$  neurons [16, 39]. Due to the limitation of computational power, we could not include  
121 this many neurons in our model. Instead, we restricted ourselves to 2000  $HVC_{RA}$  and 550  $HVC_{INT}$   
122 neurons. Since number of neurons is small, distributing them in 3D space becomes problematic  
123 because a large portion of them are near the boundary of the volume. To reduce this boundary  
124 effect, we placed neurons on a 2D sphere of radius 260  $\mu\text{m}$ .  $HVC_{INT}$  neurons were placed in a

125 lattice-like grid on the sphere, and HVC<sub>RA</sub> neurons randomly (Fig. 2a). We created connections  
126 between HVC<sub>RA</sub> and HVC<sub>INT</sub> neurons probabilistically according to the Gaussian distributions  
127 based on the distance between the neurons (Fig. 2b). These distributions are similar to those  
128 observed in experiments [14]. On average, an HVC<sub>RA</sub> neuron connects to 65 HVC<sub>INT</sub> neurons  
129 with mean distance 155  $\mu\text{m}$ , and an HVC<sub>INT</sub> neuron connects to 115 HVC<sub>RA</sub> neurons with mean  
130 distance 110  $\mu\text{m}$ . Initially, all HVC<sub>RA</sub> neurons were immature and there were no connections  
131 between them.

132 We also created axonal time delays between all neurons by setting the conduction velocity  
133 to 100  $\mu\text{m}/\text{ms}$  and using distances between neurons on the sphere. The conduction velocity was  
134 chosen such that the computed axonal delays in the model approximately match the measured  
135 axonal delays in zebra finch HVC (1 to 7.5 ms) [29].

## 136 **Growth of synaptic chain network**

137 To grow a network of connected HVC<sub>RA</sub> neurons, we used a combination of a Hebbian-like burst-  
138 timing dependent plasticity (BTDP) (Fig. 3a) and two additional plasticity rules for HVC<sub>RA</sub>  
139 neurons – axon remodeling and potentiation decay, which are similar to those used in the  
140 previous models for growth of synaptic chain networks [25, 26].

141 BTDP was modified from spike-timing dependent plasticity rule [40]. Specifically, the time  
142 difference  $\Delta t$  between the first spikes of the post- and pre-synaptic neurons was used, and a  
143 small positive shift was added to the time difference to ensure that no connections emerge  
144 between neurons firing synchronously. When  $\Delta t > 2$  ms, the synapse is potentiated (long-term  
145 potentiation, or LTP); when  $\Delta t < 2$  ms, the synapse is depressed (long-term depression, or  
146 LTD). The magnitude of LTP induction is maximum at  $\Delta t = 5$  ms, and LTD is maximal at  
147  $\Delta t = -1$  ms (Fig. 3a). The magnitudes of both LTP and LTD induction decay exponentially as  
148 the absolute value of  $\Delta t$  increases (decay constant 30 ms).

149 We distinguished three types of connections between HVC<sub>RA</sub> neurons, depending on their  
150 strength. Silent synapses were weak, nonfunctional connections, with synaptic conductance

151 smaller than a threshold value  $W_a$ . They corresponded to the synapses containing only NMDA  
152 receptors [41] and did not elicit response in the postsynaptic neuron. When synaptic strength ex-  
153 ceeded  $W_a$ , the synapse became active and produced depolarization in the postsynaptic neuron.  
154 Strong connections with weight above  $W_s$  were considered as supersynaptic connections.

155 We randomly selected a set of 10  $HVC_{RA}$  neurons as the training neurons, which formed a  
156 seed for the network growth. The training neurons were made fully mature with adult values  
157 for the resting potential and calcium dendritic conductance.  $HVC_{RA}$  neurons that were not in  
158 the training set, called pool neurons, started as immature neurons with high resting potential  
159 and devoid of dendritic calcium channels.

160 One simulation trial lasted for 500 ms in network dynamics. At each trial, the training  
161 neurons were stimulated with a synchronous kick of strong excitatory conductance. Immature  
162 pool neurons were spontaneously active during the trials due to the elevated resting potential  
163 and noise fluctuations in membrane potential. When pool neurons spiked after the training  
164 neurons, silent connections from training neurons to the pool neurons emerged according to  
165 BTDP rules (Fig. 3b). During repeating trials, silent synapses stochastically changed their  
166 strength via LTP and LTD, and can randomly become active (Fig. 3c). Emergence of too many  
167 active connections leads to uncontrolled network growth and runaway network activity. To avoid  
168 this, we introduced potentiation decay for all synapses [25, 26]. Specifically, synaptic weights of  
169 all synapses were decreased by a constant value  $\delta$  at the end of each trial.

170 Depolarization of pool neurons provided by the active synapses from the training set biased  
171 these neurons to be more active during subsequent trials. Thus, a positive feedback emerged,  
172 since activity of pool neurons facilitated strengthening of synapses via LTP, eventually forming  
173 supersynaptic connections. To enforce sparse output connections, we only allowed each  $HVC_{RA}$   
174 neuron to make a limited number of supersynaptic connections, which was set to 10 in the  
175 model. When a neuron acquired maximal number of supersynaptic outputs, the neuron under-  
176 went axon remodeling where other weak outgoing connections were pruned and did not affect  
177 their postsynaptic targets anymore [25, 26] (Fig. 3d-e). Limitations on the number of strong



178 outputs created a competition between pool neurons for the convergent inputs from the train-  
179 ing set. When training neurons formed the allowed number of supersynaptic connections, their  
180 postsynaptic targets were spiking reliably each iteration. The training neurons did not recruit  
181 any more targets. The recruited neurons then act as a new seed for the network growth.

182 In the model, network grows gradually and neurons are added to the end of the sequence  
183 (Fig. 3f). Added neurons are initially immature and have less tight burst compared to the  
184 neurons already in the sequence. With time and reliable activation, the added neurons mature  
185 and develop a tight burst. Thus, we always have immature neurons at the end of the sequence.  
186 Sequence keeps growing until all  $HVC_{RA}$  neurons are recruited into the network or its length  
187 becomes close to the length of the simulation trial.

## 188 **Axonal conduction velocity and network topology**

189 In our model, the axonal conduction velocity controlled the axonal time delays between neurons.  
190 With the conduction velocity set to  $100 \mu\text{m}/\text{ms}$ , which creates the realistic axonal time delays  
191 observed in HVC [29], the emerged network showed continuous dynamics and nearly uniform  
192 temporal distribution of burst onset times (Fig. 4a). Established connections between  $HVC_{RA}$   
193 neurons (red curve Fig. 4b) were biased towards short delay connections, but were on average  
194 longer than the preset connections to  $HVC_{INT}$  neurons. The network was temporally precise  
195 with a sub-millisecond jitter in burst onset times (Fig. 4c). Plot of the network topology based  
196 on the synaptic weights between neurons did not reveal any grouping structure (Fig. 4d). These  
197 are the characteristics of polychronous chain network proposed as the connectivity of  $HVC_{RA}$   
198 neurons within HVC in a recent study [29].

199 When we repeated the growth with a 10 times faster conduction velocity ( $1000 \mu\text{m}/\text{ms}$ ), the  
200 emerged network showed a strongly synchronous activity pattern (Fig. 4e). The distribution  
201 of axonal delays between  $HVC_{RA}$  neurons in the formed network was similar to the delay dis-  
202 tribution between randomly selected pairs of  $HVC_{RA}$  neurons (Fig. 4f). The network was also  
203 temporally precise with the jitter level similar to the polychronous chain network (Fig. 4g). Net-

204 work topology was highly structured, showing groups of neurons with similar input and output  
205 connections. In other words, the grown network had a synfire chain topology with prominent  
206 oscillatory activity coming from the identical chain layers of neurons.

207 We systematically varied conduction velocity from 0.5 to 10 times of the value measured in  
208 HVC, and observed a sharp transition in burst density oscillations at 1.5 (Fig. 4i). Networks  
209 with the velocity smaller than this value had a flat burst density, while networks with velocity  
210 exceeding this value showed prominent oscillations. We quantified the network structure using  
211 similarity of input connections for the neurons bursting synchronously in the time window of  
212 variable size (Fig. 4j). Networks with prominent oscillations in burst density (vel. 2 and 10  
213 times) showed a stair-like decay in the similarity of inputs, which is expected for synfire chain  
214 topology with defined groups and all-to-all connections from neurons in one group to the next;  
215 whereas networks with weak activity oscillations (vel. 0.5, 1 and 1.33 times) had a smooth  
216 decreasing curve, which is expected for polychronous chain networks with no definable groups.  
217 All grown networks, regardless synfire chains or polychronous chains, possessed a property of  
218 nearly synchronous excitatory inputs to the postsynaptic neurons (Fig. 4k).

219 To understand how conduction velocity influences the network topology, we examined the  
220 case of slow conduction velocity, for which the potential connections between neurons have a wide  
221 range of axonal delays. We monitored the burst onset latency of the recruited neurons relative  
222 to their presynaptic neurons (parents) (Fig. 5a). In the beginning of recruitment, connections  
223 to the recruited neurons were still weak and these neurons had a large range of burst onset  
224 latency. This permitted connections with a large range of delays to target the recruited neurons  
225 via LTP (Fig. 5b). Subsequently, however, the burst onset latency was gradually decreasing due  
226 to strengthening of the connections from the parent neurons (Fig. 5a, inset). This resulted in  
227 pruning of some of the inputs with long axonal delays via LTD (Fig. 5c). Therefore, the grown  
228 network has a prominent bias towards forming short delay connections while keeping a few long  
229 delay connections, characteristic of the delay distribution for the polychronous chain topology.  
230 In contrast, when the conduction velocity is high, all possible connections have short delays, and

231 there is no bias towards short distance connections. In this case, synfire chain topology emerges.

## 232 **The role of inhibition in network growth**

233 Inhibition should play an important role in network growth since it impacts the spontaneous ac-  
234 tivity of immature neurons. Due to the randomness of the connections between  $HVC_{RA}$  neurons  
235 and  $HVC_{INT}$  neurons, feedback inhibition to individual  $HVC_{RA}$  neurons is inhomogeneous in time.  
236 To see if this affects which neurons get recruited into the network, we tracked the inhibitory  
237 conductance of all  $HVC_{RA}$  neurons in the network. We considered a simulation with conduction  
238 velocity  $100 \mu\text{m}/\text{ms}$  (the value observed in HVC [29]) and switched off the replacement of silent  
239 non-recruited neurons to allow a direct comparison between recruited and non-recruited neu-  
240 rons. We observed that in the grown network, individual inhibitory connections to non-recruited  
241 neurons were stronger compared to inhibition to recruited neurons (Fig. 6a-b). Total inhibitory  
242 input, computed as a sum of all inhibitory input conductance, was also significantly larger for  
243 non-recruited neurons ( $P < 10^{-42}$ , one-sided t-test). We then compared temporal dynamics  
244 of inhibitory conductance of recruited and non-recruited  $HVC_{RA}$  neurons during recruitment  
245 (Fig. 6d-k). When aligned to their presynaptic parent neurons (Fig. 6d-g), recruited neurons  
246 showed significantly smaller inhibitory conductance ( $P < 10^{-46}$ , one-sided paired t-test) in LTP  
247 window, time interval which is critical for the selection of postsynaptic targets. This observa-  
248 tion shows that neurons that receive less inhibition from the parent neurons are preferentially  
249 recruited into the growing edge of the network.

250 When aligned postsynaptically (Fig. 6h-k), recruited neurons during the recruitment show an  
251 increase in inhibitory conductance right after the burst onset time ( $P < 10^{-176}$ , one-sided paired  
252 t-test). We attribute this observation to the self-inhibition of the neurons due to the prevalence  
253 of local connections between  $HVC_{RA}$  neurons and  $HVC_{INT}$  neurons. By bursting,  $HVC_{RA}$  neuron  
254 activated a subset of nearby interneurons, which in turn provided a feedback inhibition. The  
255 effect of such self-inhibition was not seen in the grown network due to the high network driven  
256 activity of  $HVC_{INT}$  neuron population (Supplementary Fig. 9b).

257 During the recruitment, the inhibitory conductance on the recruited neurons right before  
258 the burst onset time was smaller than the mean computed over the simulation trials (Fig. 6i,k,  
259  $P < 10^{-170}$ , one-sided paired t-test). This further supports that HVC<sub>RA</sub> neurons requires less  
260 inhibition on average to be recruited. Since initial excitatory inputs to HVC<sub>RA</sub> neurons are  
261 weak, the recruitment favors HVC<sub>RA</sub> neurons with receiving less inhibition to ensure they can  
262 be activated by the parent neurons at the growing edge. After the network is grown and the  
263 excitatory conductance become strong, inhibitory conductance before bursts need not be small,  
264 since activations of neurons rely on strong excitatory inputs (Supplementary Fig. 9c).

## 265 **Experimental evidence linking maturity of HVC<sub>RA</sub> neurons and sequence growth**

266 The length of sequential activity of HVC<sub>RA</sub> neurons grows during vocal development in zebra  
267 finches [27]. To see whether immature neurons are involved in the sequence growth, we rean-  
268 alyzed the dataset of extracellular recordings in HVC of juvenile zebra finches [27, 42]. The  
269 dataset is organized into four stages of song development [27]: subsong, which is highly vari-  
270 able ( $\sim 48$  days post hatch (dph)); protosyllable song, which contains syllables with definable  
271 durations around 100 ms ( $\sim 58$  dph); multi-syllable song, which contains syllables with distinc-  
272 tive spectral characteristics ( $\sim 62$  dph); and motif song, which consists of a reliable sequence of  
273 syllables like adult song ( $\sim 73$  dph).

274 HVC<sub>RA</sub> neurons in adult birds produce highly stereotyped bursts of 4-5 spikes lasting approx-  
275 imately 6 ms [8]. Experiments and computational models suggest that such a burst is driven  
276 by dendritic calcium spike [9, 15]. Since immature neurons typically do not have fully devel-  
277 oped dendritic trees [30, 43], immature HVC<sub>RA</sub> neurons may not be able to generate brief, high  
278 frequency bursts. Indeed, spike patterns of projection neurons during song development varied  
279 significantly in the number of spikes produced per burst and in the burst duration [27]. We  
280 therefore assumed that burst tightness is an indicator for HVC<sub>RA</sub> neuron maturity. Specifically,  
281 we defined burst tightness as the first interspike interval in the burst (Fig. 7a). We observed  
282 that bursts in the HVC<sub>RA</sub> neuron population gradually tightened as the song progressed through

283 the protosyllable, multi-syllable and motif stages (Fig. 7b, multi-syllable versus protosyllable,  
284  $p = 0.023$ , one-sided Wilcoxon rank sum test; motif versus multi-syllable,  $p < 0.0001$ , one-sided  
285 Wilcoxon rank sum test), supporting that burst tightness is positively linked to song develop-  
286 ment and presumably to HVC<sub>RA</sub> neuron maturation.

287 We next looked at the burst tightness of the HVC<sub>RA</sub> neurons that are locked to syllables,  
288 *i.e.* those tend to burst at fixed latencies relative to the syllable onset times (Fig. 7c). In  
289 the protosyllable stage, the first spike interval significantly increases with the burst latency  
290 ( $p = 0.012$ , two-tailed t-test), suggesting that bursts are tighter for neurons bursting at the start  
291 of the syllables than those at the end. Thus, the maturity of HVC<sub>RA</sub> neurons are heterogeneous  
292 in this stage, and immature neurons tend to burst towards the end of the syllables. This trend  
293 is less pronounced but still significant in the multi-syllable stage ( $p = 0.017$ , two-tailed t-test).  
294 It disappears in the motif stage ( $p = 0.14$ , two-tailed t-test).

295 Our analysis provides evidence that the maturity of HVC<sub>RA</sub> neurons is correlated with their  
296 burst timings during song learning, and that immature neurons are preferentially added to the  
297 end of the growing sequence in HVC.

## 298 Discussion

299 In adult zebra finch, HVC<sub>RA</sub> neurons burst sequentially with millisecond precision during singing  
300 [8]. Electrophysiological [10] and calcium imaging [11] studies showed that the sequence is  
301 continuous, supporting the idea that such sequential bursts are generated within HVC through  
302 feedforward synaptic chain network [15, 12, 9]. Previous models suggested that such a network  
303 can be wired by recruiting neurons group by group through synaptic plasticity and spontaneous  
304 activity, resulting in growth of sequence during the wiring process [25, 26]. This prediction is in  
305 agreement with an experiment that recorded projection neurons in HVC of juvenile zebra finch  
306 [27]. Our reanalysis of this experimental data [42] suggested that HVC<sub>RA</sub> neurons at the growth  
307 edge have hallmarks of immature neurons. We therefore further extended the model to include  
308 the maturation dynamics of HVC<sub>RA</sub> neurons. Moreover, we included more biologically realistic

309 features that lacked in previous models, including explicit modeling of  $HVC_{INT}$  neurons, spatial  
310 distributions of HVC neurons, and realistic axonal delays in HVC [29]. We show that immature  
311 neurons, which are more excitable hence have higher spontaneous activity rates compared to  
312 mature neurons, are preferentially recruited at the growth edge. The inclusion of the axonal  
313 delays leads to a long polychronous chain network, a structure favored by a recent analysis of  
314 HVC network and dynamics [29]. In contrast, neglecting axonal delays leads to synfire chains  
315 [44, 45], previously thought to be the topology of the HVC network [15, 25, 26]. Explicit modeling  
316 of  $HVC_{INT}$  also predicts that the wiring process favors a path of less inhibition, such that neurons  
317 that are recruited receive less forward inhibition from the recruiting neurons, highlighting the  
318 importance of inhibition in HVC [13]. Our model also reproduces the observation that  $HVC_{RA}$   
319 neurons connect to more distal  $HVC_{RA}$  neurons, unlike their tendency to connect to nearby  
320  $HVC_{INT}$  neurons [14].

321 Inclusion of immature neurons has an important effect on the growth process of synaptic  
322 chain networks. In the model, spontaneous activity plays a critical role. The distinction between  
323 immature and mature neurons allows different levels of spontaneous activity in these two pop-  
324 ulations. Immature neurons are more spontaneously active due to higher intrinsic excitability,  
325 and they are the targets of recruitments by the neurons at the growth edge. In contrast, mature  
326 neurons in the network are not spontaneously active, hence are not targets of recruitments. This  
327 allows continued growth of the network, as long as there is a supply of immature neurons in the  
328 pool. This was not the case in the previous models, in which there was a single neuron popula-  
329 tion [15, 25, 26]. There, all neurons had similar level of spontaneous activity and consequently,  
330 the chain growth usually stopped by formation of loops after neurons already into the chain  
331 were recruited. We have confirmed that loops emerge in our model as well when using a single  
332 population of mature and spontaneously active  $HVC_{RA}$  neurons (Supplementary Fig. 10).

333 During development, immature neurons in many neural circuits across multiple species go  
334 through a period of depolarizing inhibition before switching to hyperpolarizing inhibition, which  
335 is caused by an elevated GABA reversal potential on immature neurons [46]. Our computational

336 experiments with developmental switch in GABA resulted in the emergence of numerous connec-  
337 tions between nearby  $HVC_{RA}$  neurons (data not shown). This was because dense local connec-  
338 tivity between  $HVC_{RA}$  and  $HVC_{INT}$  neurons promotes recruitment of nearby immature neurons  
339 through depolarizing local inhibition. Experimentally, local connections between  $HVC_{RA}$  neu-  
340 rons are sparse [14]. We therefore assumed that the emergence of connectivity between  $HVC_{RA}$   
341 neurons happens at the time when GABA exerts an adult hyperpolarizing response on immature  
342 neurons. This assumption needs to be tested in future studies with intracellular recordings of  
343  $HVC_{RA}$  neurons during development.

344 In our model, maturation of immature neurons is activity driven. Spontaneously activity  
345 alone is enough for the neuron to mature, but more reliable activation after recruitment into  
346 the network accelerates the maturation. This acceleration protects the grown network from  
347 spontaneous activation and hence from formation of loops. This maturation dynamics is inspired  
348 by the observation in rodent hippocampus that adult-born neurons mature faster with enhanced  
349 activity and mature more slowly with reduced activity [47]. The exact value of the activity-driven  
350 maturation time scale is not important, as long as it is much smaller than the spontaneous one.  
351 Neurons that become mature but not recruited into the network become silent eventually and  
352 are replaced by a fresh immature neuron. This turnover ensures that there is a fresh supply  
353 of immature neurons for the chain growth. The rate of replacement also controls the number  
354 of available targets for the growth, which is important for forming convergent inputs to the  
355 targets during the recruitment process. If the number of targets is too large, recruiting neurons  
356 can connect to divergent targets, and the resulting network is not capable of producing precise  
357 timing. A consequence of the turnover is that the bursting timing of neurons in the chain network  
358 is positively correlated with the order of their introduction. In other words, timing correlates  
359 with birth order. This prediction of our model can be tested by labeling cohorts of newborn  
360 neurons using viral strategy in juvenile [22] and recording their burst timings in adulthood using  
361 calcium imaging [11].

362 Addition and turnover of  $HVC_{RA}$  neurons post hatch has been observed for over 30 years [20,

363 48], but the significance of this process for birdsong learning and production remains unclear [28,  
364 23]. In juvenile zebra finch, deprivation of auditory inputs by deafening before song learning [49]  
365 and inability to learn tutor song due to peripheral nerve injury [50] did not impact recruitment  
366 of HVC<sub>RA</sub> neurons. These observations are consistent with our view that addition of HVC<sub>RA</sub>  
367 neurons mainly contributes to the self-organized wiring process of the synaptic chain network  
368 in HVC, which should not depend on auditory inputs or learning specific tutor song.

369 Synfire chain is a popular feedforward model generating precise and stable sequential activity  
370 of neurons [44, 45, 51]. Several computational models have explored the formation of synfire  
371 chains. Successful models that can grow long sequences use a combination of STDP rules and  
372 additional synaptic plasticity mechanism to constrain the connectivity. With STDP rule and  
373 heterosynaptic plasticity rules that limit the total incoming and outgoing synaptic weights for  
374 each neuron, Fiete et al [52] showed formation of synfire chain loops with length distributed  
375 according to a power law. Short loops were more numerous than long loops. However, to form  
376 groups of neurons that fire at the same time as observed in HVC, the model needed to introduce  
377 additional correlated inputs that defined coherent groups before chain formation. Jun and Jin  
378 [25] showed that synfire chain forms with Hebbian STDP and additional synaptic plasticity  
379 rules that constrain the number of strong output connections. The model was able to show the  
380 gradual growth of synfire chains through group-by-group recruitment of HVC<sub>RA</sub> neurons. The  
381 process ends with the formation of a loop, with length following a Gaussian distribution [26].

382 Our study builds upon the gradual recruitment model [25, 26] and uses similar synaptic  
383 plasticity rules. However, our model introduces several realistic features that none of the previous  
384 models had, including explicit modeling of HVC<sub>INT</sub> neurons; spatial distributions of neurons and  
385 realistic axonal time delays recently measured in HVC [29]; and, most importantly, newly born  
386 HVC<sub>RA</sub> neurons and their maturation dynamics. These lead to novel insights, as discussed earlier.  
387 Additionally, no loops form in our model, unlike all previous models. Under realistic axonal time  
388 delays, we show that a continuous polychronous network rather than synfire chain emerges after  
389 the training. The network still possesses a sub-millisecond level of precision and its burst times



390 cover the sequence almost uniformly with no silent gaps. We also show that by using connections  
391 with fast conduction velocity, we can recover the synfire chain topology. Grown synfire chain  
392 has similar sub-millisecond level of precision, but its burst density shows prominent oscillations.  
393 We demonstrate that by changing axonal conduction velocity between  $HVC_{RA}$  neurons, we can  
394 grow either synfire chain or polychronous chain network. In the polychronous chains, neurons  
395 are driven by almost synchronous inputs despite of distributed presynaptic spike times due to  
396 the delays. This is similar to a previous study in which approximately 70 ms long polychronous  
397 sequences with an average size around 20 neurons emerged and disappeared in a recurrent  
398 network with STDP rules for synaptic plasticity [53]. However, in our case incorporation of  
399 additional synaptic plasticity rules produce stable sequences that span hundreds of milliseconds  
400 and contain hundreds of neurons. Thus, we show that long polychronous neuronal sequence can  
401 emerge from a combination of STDP and additional synaptic plasticity rules.

402 Our growth algorithm is robust with respect to the changes in the model parameter values.  
403 The use of different strength of inhibitory connections (varied between  $G_{ie} = 0.015 \text{ mS/cm}^2$   
404 and  $G_{ie} = 0.060 \text{ mS/cm}^2$ ), different number of efferent supersynaptic connections ( $N_s = 10$  and  
405  $N_s = 20$ ), and different maximal strength of excitatory connections between  $HVC_{RA}$  neurons  
406 (between  $G_{max} = 1.5 \text{ nS}$  and  $G_{max} = 4 \text{ nS}$ ) lead to the emergence of precisely timed neural  
407 sequences (data not shown). Thus our modeling results do not rely on fine-tuning of the model  
408 parameters.

409 Our re-analysis of the data that recorded HVC neurons in juveniles [27, 42] showed that burst  
410 tightness of projection neurons decreases with the burst timing during the sequence growth  
411 in the protosyllable state. This difference disappears in later stages of song learning. We  
412 interpreted the less tightness of bursts as a reflection of immature intrinsic bursting mechanism.  
413 An alternative possibility is that the burst tightness is a network phenomenon. It is possible  
414 that neurons that burst earlier in the sequence are better connected and get stronger inputs,  
415 leading to tight bursts, whereas those that burst later are still in process of getting incorporated  
416 and hence are loosely connected. Another possibility is that feedback inhibition controls the

417 burst tightness [54]. There is some evidence in the data that supports the intrinsic mechanism.  
418 We found one HVC<sub>RA</sub> neuron in the subsong stage that was not locked to vocalization but still  
419 showed tight bursts usually observed in the motif stage (Supplementary Fig. 11). Since the  
420 network is unlikely formed in this stage, this observation favors intrinsic mechanism for burst  
421 tightness. Due to limited number of HVC<sub>RA</sub> neurons recorded in subsong stage and subsequent  
422 protosyllable stage, we could not gather more evidence. Future experiments with more data on  
423 HVC<sub>RA</sub> neurons in early song learning stages, perhaps also including intracellular recordings *in*  
424 *vivo* and in slices, should be able to address whether burst tightness is intrinsically controlled.

425 We use synaptic plasticity rules based on the timing of burst onsets (BTDP). This simple  
426 rule sidesteps the complex interaction of multiple spikes within the bursting pre- and post-  
427 synaptic neurons [55], and is guided by the observation that in cortical neurons, the timings  
428 of the first spikes in bursts are most important for determining the timing-dependent LTP and  
429 LTD [56]. In addition, we apply a small 2 ms shift of BTDP curve to the region of positive times,  
430 so that there is an LTD for synchronously bursting neurons. This prevents the emergence of  
431 connections between neurons that fire synchronously. Such a shift was used to stabilize weight  
432 distributions in random networks of spiking neurons in another modeling study [57]. Whether  
433 these rules apply to synaptic plasticity for HVC<sub>RA</sub> neurons remains to be seen. To date, there  
434 is no systematic study of synaptic plasticity in HVC, and further experiments are needed.

435 In addition to sequence growth, extracellular recordings in juvenile zebra finches also revealed  
436 sequence splitting during the syllable development [27]. At the protosyllable stage, majority of  
437 the projection neurons fired in a single protosequence. When several syllable types emerged from  
438 a common protosyllable, the corresponding protosequence split. While there were still neurons  
439 firing at all syllables with the same latencies relative to syllable onsets (“shared neurons”), more  
440 neurons fired specifically to a single syllable type. Gradually, the shared neurons disappeared.  
441 The authors proposed a model, according to which a protosequence grown from a common seed  
442 of synchronously activated neurons is split by dividing the seed into several groups activated at  
443 different times, and also by increasing local inhibition. In our study, the splitting does not happen

444 during the network growth and we did not explore mechanisms for it to happen. Activation of  
445 seed neurons at different times and increase in inhibition may also induce protosequence splitting  
446 in our model.

447 In conclusion, we have shown that protracted addition of new neurons in HVC in juvenile  
448 helps to wire synaptic chain network through a self-organized process. Our model illustrates the  
449 possibility that birth order of neurons is important for constructing functional microcircuits in  
450 local brain areas.

## 451 **Methods**

### 452 **Juvenile zebra finch data analysis**

453 We reanalyzed a previously reported data set of extracellular recordings in HVC of juvenile  
454 zebra finches [27, 42]. The data set contained recordings of projection neurons from 32 birds  
455 during the song development (44-112 dph).  $HVC_{RA}$  neurons exhibited sparse bursting activity.  
456 Following the procedure in Okubo et al [27], a burst was defined as a continuous group of spikes  
457 separated by intervals of 30 ms or less. To determine the burst tightness of a projection neuron,  
458 we estimated the median of the first interspike intervals of all the bursts produced by the neuron  
459 at a given song learning stage (subsong, protosyllable, multi-syllable, and motif). To find the  
460 bursting time of the neurons locked to syllables, we followed the approach in Okubo et al [27].

### 461 **Network model**

462 We distributed 2000  $HVC_{RA}$  and 550  $HVC_{INT}$  neurons over the 2-D sphere of radius  $260 \mu m$   
463 with no overlap. A neuron occupies a volume of a sphere with diameter  $10 \mu m$ .  $HVC_{INT}$  neurons  
464 were first placed evenly on the sphere using the Fibonacci lattice [58]. The distance between  
465 nearest neighbors on sphere is approximately  $\Delta r_{in} = 40 \mu m$ , which matches the average dis-  
466 tance between  $HVC_{INT}$  in real HVC (as estimated from the HVC volume and the number of  
467 interneurons). Then, they were randomly shifted along the sphere surface by a small amount:

468  $\Delta\theta = 0.0006\Delta r_{in}$  and  $\Delta\phi = 0.0006\Delta r_{in}/\sin(\theta)$ , where  $\theta$  is the latitude of a neuron's position  
469 on the sphere,  $\phi$  is its longitude. HVC<sub>RA</sub> neurons were placed randomly over the surface sphere,  
470 with the constraint that they do not overlap with other HVC<sub>RA</sub> or HVC<sub>INT</sub> neurons.

471 Connections between HVC<sub>INT</sub> and HVC<sub>RA</sub> neurons were placed probabilistically based on  
472 the distance between neurons along the sphere:  $p_{RA\rightarrow I} = \exp(-d^2/\sigma_{RA\rightarrow I}^2)$  and  $p_{I\rightarrow RA} =$   
473  $\exp(-d^2/\sigma_{I\rightarrow RA}^2)$ , where  $p_{RA\rightarrow I}$  is a probability for a given HVC<sub>RA</sub> neuron to contact a given  
474 HVC<sub>INT</sub> neuron,  $p_{I\rightarrow RA}$  is a probability for a given HVC<sub>INT</sub> neuron to contact a given HVC<sub>RA</sub> neu-  
475 ron,  $d$  is a distance between given HVC<sub>RA</sub> and HVC<sub>INT</sub> neurons on the sphere,  $\sigma_{RA\rightarrow I} = 130 \mu m$ ,  
476 and  $\sigma_{I\rightarrow RA} = 90 \mu m$ . Only a single connection between a pair of neurons was allowed. Pa-  
477 rameter  $\sigma_{RA\rightarrow I}$  was chosen to match the upper bound on the number of postsynaptic HVC<sub>INT</sub>  
478 partners for an HVC<sub>RA</sub> neuron [14, 59]. On average an HVC<sub>RA</sub> neuron contacted 11.6% of  
479 HVC<sub>INT</sub> neurons. HVC<sub>INT</sub> neurons had a smaller spatial connectivity scale to influence nearby  
480 HVC<sub>RA</sub> neurons. A single HVC<sub>INT</sub> neuron contacted 5.8% of HVC<sub>RA</sub> neurons. Conductance of  
481 the connections were sampled from uniform distributions on the intervals  $(0, G_{ei})$  for HVC<sub>RA</sub>  
482 to HVC<sub>INT</sub> connections and  $(0, G_{ie})$  for HVC<sub>INT</sub> to HVC<sub>RA</sub> connections, with  $G_{ei} = 0.4 mS/cm^2$   
483 and  $G_{ie} = 0.03 mS/cm^2$ . Axonal time delays for the connections were calculated by multiplying  
484 the distance between neurons by axonal conduction velocity. Normal conduction velocity was  
485 set to  $100 \mu m/ms$ , as observed in HVC [29]. Connections between HVC<sub>RA</sub> neurons did not exist  
486 at the start of simulations.

487 A randomly selected set of 10 HVC<sub>RA</sub> neurons were chosen as the starting seed for the network  
488 growth. The training neurons had the mature properties, while other HVC<sub>RA</sub> neurons started  
489 as immature.

## 490 Growth simulation

491 Network dynamics was run in trials of 500 ms duration with a time step 0.02 ms. In the beginning  
492 of each trial, the dynamical variables of neurons were reset to their resting values. At a random  
493 time between 100 ms and 400 ms in trial, the training neurons were excited by a synchronous

494 excitatory conductance kick of strength 300 nS, which made them burst. Simulations were run  
495 until the number of supersynaptic connections in the network remained constant for 10000 trials.

## 496 Neuron model

497 For HVC<sub>INT</sub> neuron we used a single compartment Hodgkin-Huxley model identical to the one  
498 described in [9]. For HVC<sub>RA</sub> neuron we used a two-compartmental Hodgkin-Huxley model with  
499 soma and dendrite similar to the one in [9].

500 Parameters of sodium, potassium and leak currents of the soma of a mature HVC<sub>RA</sub> are iden-  
501 tical to those in [9]. Somatic compartment is additionally equipped with low-threshold potassium  
502 current  $I_{KLT} = G_{s,KLT}l(V_s - E_K)$  with conductance  $G_{s,KLT} = 3.5 \text{ mS/cm}^2$ , potassium reversal  
503 potential  $E_K = -90 \text{ mV}$  and gating variable  $l$ . Gating variable obeys the following dynamics:  
504  $\tau_l dl/dt = l_\infty(V) - l$ , where  $\tau_l = 10 \text{ ms}$ ,  $l_\infty(V) = 1/(1 + \exp -(V + 40)/5)$ . Parameters of the  
505 dendritic compartment of a mature HVC<sub>RA</sub> are identical to [9], except for  $\tau_c = 15 \text{ ms}$ .

506 Immature HVC<sub>RA</sub> neuron has elevated leak reversal potential  $E_L = -55 \text{ mV}$  in both somatic  
507 and dendritic compartments. In addition, the calcium conductance in the dendritic compartment  
508 of immature HVC<sub>RA</sub> were set to zero.

## 509 Synapse model

510 Synaptic conductances on neurons were modeled according to “kick-and-decay” dynamics [9].  
511 Synaptic conductance of a neuron increases following a delivery of a spike to the synapse with  
512 conductance  $G$ :  $g_{syn} \rightarrow g_{syn} + G$ . In between spike arrivals, synaptic conductance decays expo-  
513 nentially:  $\tau_{syn} dg_{syn}/dt = -g_{syn}$ . We used the same values for synaptic decay time constants as  
514 in [9].

## 515 Noise model and simulation

516 Noise in HVC<sub>INT</sub> neurons was created using stochastic Poisson spike trains arriving at excitatory  
517 and inhibitory synapses, mimicking random synaptic activity, such that HVC<sub>INT</sub> neurons spiked

518 spontaneously with rate  $\sim 10$  Hz. Parameters of the Poisson spike trains were identical to [9].  
519 Dynamics of HVC<sub>INT</sub> neuron was solved using Dormand-Prince order 8 method [60].

520 Noise in HVC<sub>RA</sub> neurons was implemented by injecting white noise current of amplitude 0.1  
521 nA to soma and 0.2 nA to dendrite [29]. To account for white noise stimulus, HVC<sub>RA</sub> model  
522 was treated as a system of stochastic differential equations and was solved with weak order 3  
523 AN3D1 method [61].

## 524 **Maturation model**

Maturation of HVC<sub>RA</sub> neurons was modeled as a gradual increase of dendritic calcium conduc-  
tance, and a gradual decrease in the somatic and dendritic leak reversal potential:

$$\tau_{mat} \frac{dG_{Ca}}{dt} = G_{mat} - G_{Ca},$$

$$\tau_{mat} \frac{dE_L}{dt} = E_{mat} - E_L,$$

525 where  $\tau_{mat}$  is the maturation time constant;  $G_{mat} = 55 \text{ mS/cm}^2$  is the mature value of calcium  
526 conductance; and  $E_{mat} = -80 \text{ mV}$  is the mature value of leak reversal potential. Values of  
527  $G_{Ca}$  and  $E_L$  were updated at the end of each trial. Maturation rate of an HVC<sub>RA</sub> neuron  $\tau_{mat}$   
528 depended on its activity history. If a neuron spiked in less than half of the trials in the past  
529 1000 trials, it was treated as spontaneously spiking. Once a neuron spiked in more than half of  
530 the trials in the past 1000 trials, it was treated as reliably spiking. For a spontaneously spiking  
531 neuron, maturation time constant was set to  $\tau_{mat} = 50,000$  s. For a reliably spiking neuron,  
532 maturation time constant was set to a smaller value of  $\tau_{mat} = 500$  s.

## 533 **Neuronal turnover**

534 Neuron was assigned as silent if it spiked in less than 80 trials in the past 4000 trials. Silent  
535 neurons were replaced at the end of each trial with immature neurons. New immature neurons  
536 were placed randomly on the surface of the sphere representing HVC, avoiding overlaps with all

537 HVC<sub>RA</sub> and HVC<sub>INT</sub> neurons.

### 538 BTDP synaptic plasticity rule

To update weights between HVC<sub>RA</sub> neurons, we used a BTDP rule based on burst onset timing between presynaptic and postsynaptic neurons (Fig. 3a). We defined a “burst” as a continuous group of spikes with duration 30 ms or less. Burst onset time was defined as the first spike in a burst. Each time a neuron produced a new burst, all afferent synapses onto the neuron and all efferent synapses are updated. For a pair of a presynaptic neuron  $i$  with burst onset time  $t_i$  and a postsynaptic neuron  $j$  with burst onset time  $t_j$ , an additive LTP would occur for the synapse with weight  $G_{ij}$  if  $\Delta t = t_j - t_i > T_0$ :

$$G_{ij} \rightarrow G_{ij} + \begin{cases} A_P(\Delta t - T_0)/T_P, & \text{if } \Delta t < T_0 + T_P, \\ A_P \exp(-(\Delta t - T_0 - T_P)/\tau_P), & \text{if } \Delta t \geq T_0 + T_P. \end{cases}$$

If  $\Delta t \leq T_0$ , the synapse undergoes depression through multiplicative LTD:

$$G_{ij} \rightarrow G_{ij} - \begin{cases} A_D G_{ij}(T_0 - \Delta t)/T_D, & \text{if } \Delta t > T_0 - T_D, \\ A_D G_{ij} \exp((\Delta t - T_0 + T_D)/\tau_D), & \text{if } \Delta t \leq T_0 - T_D, \end{cases}$$

539 The following parameters were used in simulations unless specified:  $A_P = 0.25$  nS,  $A_D = 0.02$ ,  
540  $T_0 = 2$  ms,  $T_P = 3$  ms,  $T_D = 3$  ms,  $\tau_P = 30$  ms,  $\tau_D = 30$  ms. All weights were clipped below  
541  $G_{min} = 0$  nS and above  $G_{max} = 4$  nS.

### 542 Synapse states

543 Synapses were in 1 of 3 possible states depending on their synaptic weight. Synapses with  
544 weights  $0 < W < W_a$  were silent and did not elicit response in postsynaptic neurons. Synapses  
545 with weights  $W_a < W < W_s$  were active and produced depolarization in postsynaptic neurons.  
546 Synapses with weights  $W > W_s$  were supersynapses that produced a strong response in postsy-

547 naptic neuron. Regardless of their state, all synapses participated in BTDP update rules. The  
548 following parameters were used in simulations unless specified:  $W_a = 0.2$  nS,  $W_s = 1.0$  nS.

### 549 **Potential decay**

550 All synapses experience a depression at the end of each trial:  $G \rightarrow G - \delta$ , where  $\delta = 0.01$  nS.  
551 This depression is needed to prevent the emergence of too many active synapses that may lead  
552 to uncontrolled network growth [26].

### 553 **Axon remodeling**

554 The axon remodeling rule was identical to the one in [25]. When the number of efferent super-  
555 synaptic connections of a neuron reaches  $N_s = 10$ , the neuron is saturated and all other active  
556 efferent connections of the neuron are withdrawn. Withdrawn connections do not elicit effect  
557 on postsynaptic neurons and do not participate in BTDP updates. However, they still undergo  
558 potentiation decay. Withdrawn connections will be re-connected if the neuron loses one or more  
559 of its supersynapses.

### 560 **Neural activity analysis**

561 Burst density was calculated as a histogram of burst onset times with bin size 1 ms. The  
562 presence of oscillations in burst density was estimated using the coefficient of variation (CV),  
563 which is a standard deviation divided by the mean. Jitter in a neuron's timing was calculated  
564 as a standard deviation of the burst onset times based on the 200 test runs of the dynamics of  
565 the grown network.

### 566 **Network structure**

567 Plots of network topology were based on the supersynaptic weights between neurons and were  
568 created using Kamada-Kawai algorithm in Pajek software program for network analysis [62].



569 Network structure was also analyzed using the similarity of inputs to neurons that spike  
570 synchronously within a time window  $T_w$ . For neuron  $i$  that bursts at  $t_i$ , the synchronously  
571 spiking neurons have their burst onset times within a time interval  $(t_i - T_w/2, t_i + T_w/2)$ . The  
572 similarity of inputs to neuron  $i$  and a synchronously spiking neuron is computed as the fraction  
573 of the presynaptic neurons common to the two neurons among all presynaptic neurons to the  
574 two neurons (the Jaccard index). The mean Jaccard index of all synchronously spiking neurons  
575 at  $t_i$  represents the similarity of inputs at this time. The mean Jaccard index for all burst times  
576 is defined as the similarity of inputs for a given time window  $T_w$ .

## 577 Analysis of inhibition

578 With neuronal turnover disabled and the conduction velocity set to 100  $\mu\text{m}/\text{ms}$ , inhibitory  
579 conductance of all HVC<sub>RA</sub> neurons was tracked for 30000 trials. By the end of these trials,  
580 the number of supersynaptic and active connections have reached stable values and the network  
581 growth stopped. A neuron was designated as recruited if it spiked consistently during the testing  
582 trials of the grown network in more than 95 out of 100 trials. The time of its recruitment was  
583 estimated using its spike history during the growth. At each trial, the number of the neuron's  
584 spikes averaged over a window of the past 25 trials was computed, and when the average first  
585 reached 1, which signaled the start of reliable spiking, the trial was defined as the trial at which  
586 the neuron was recruited.

587 For a recruited neuron  $i$ , an LTP window is defined relative to the burst time of its presynap-  
588 tic neuron  $j$ , during which the synaptic strength from neuron  $j$  to neuron  $i$  can be strengthened  
589 according to the BTDP synaptic plasticity rule. Specifically, the window is the time interval  
590  $(t_j + d_{ji} + T_0, t_j + d_{ji} + T_0 + \tau_P)$ , where  $d_{ji}$  is the axonal delay;  $T_0 = 2$  ms is the time shift in  
591 BTDP synaptic plasticity rule; and  $\tau_P = 30$  ms is the time scale of the LTP part of BTDP. At  
592 each trial before the recruitment, a set of inhibitory conductance traces on neuron  $i$  is extracted  
593 in the LTP windows relative to all its presynaptic neurons. The average of this set represents  
594 an inhibitory conductance of the recruited neuron at trial  $T$  aligned to its presynaptic neurons.

595 For comparison, an average inhibitory conductance of non-recruited neurons is extracted in the  
596 same time intervals, and is defined as the inhibitory conductance of non-recruited neurons. Dif-  
597 ference in the area under conductance curves is computed numerically using a trapezoid method.  
598 The median difference in the area computed for all trials before the recruitment represents the  
599 difference in the inhibitory conductance between the recruited neuron and the non-recruited  
600 neurons.

601 For analysis of inhibition on a recruited neuron  $i$  relative to its burst onset times before the  
602 recruitment, only trials in which neuron  $i$  produced bursts are considered. For each such trial,  
603 the area under the inhibitory conductance curve is calculated for 10 ms before and 10 ms after  
604 the burst onset time. The median difference in area for all trials represents the difference in the  
605 inhibitory conductance before and after bursting of neuron  $i$ . The difference of the inhibitory  
606 conductance before burst relative to the average is defined as median of the differences between  
607 the mean inhibitory conductance 10 ms before the burst and the mean during the trial for all  
608 trials before the recruitment.

609 To investigate the inhibition after recruitment, similar procedure is applied to 100 test trials  
610 of the grown network.

## 611 References

- 612 [1] Shirley Ann Bayer, Joseph Altman, et al. *Neocortical development*, volume 1. Raven Press  
613 New York, 1991.
- 614 [2] Qin Shen, Yue Wang, John T Dimos, Christopher A Fasano, Timothy N Phoenix, Ihor R  
615 Lemischka, Natalia B Ivanova, Stefano Stifani, Edward E Morrissey, and Sally Temple. The  
616 timing of cortical neurogenesis is encoded within lineages of individual progenitor cells.  
617 *Nature neuroscience*, 9(6):743, 2006.
- 618 [3] Yuichi Deguchi, Flavio Donato, Ivan Galimberti, Erik Cabuy, and Pico Caroni. Temporally  
619 matched subpopulations of selectively interconnected principal neurons in the hippocampus.  
620 *Nature neuroscience*, 14(4):495, 2011.
- 621 [4] Tatsumi Hirata and Lena Iwai. Timing matters: A strategy for neurons to make diverse  
622 connections. *Neuroscience research*, 2018.
- 623 [5] Fernando Nottebohm and Arthur P Arnold. Sexual dimorphism in vocal control areas of  
624 the songbird brain. *Science*, 194(4261):211–213, 1976.
- 625 [6] Fernando Nottebohm, Tegner M Stokes, and Christiana M Leonard. Central control of song  
626 in the canary, *serinus canarius*. *Journal of Comparative Neurology*, 165(4):457–486, 1976.
- 627 [7] Philip H Price. Developmental determinants of structure in zebra finch song. *journal of*  
628 *comparative and physiological psychology*, 93(2):260, 1979.
- 629 [8] Richard HR Hahnloser, Alexay A Kozhevnikov, and Michale S Fee. An ultra-sparse code  
630 underlies the generation of neural sequences in a songbird. *Nature*, 419(6902):65, 2002.
- 631 [9] Michael A Long, Dezhe Z Jin, and Michale S Fee. Support for a synaptic chain model of  
632 neuronal sequence generation. *Nature*, 468(7322):394, 2010.

- 633 [10] Galen F Lynch, Tatsuo S Okubo, Alexander Hanuschkin, Richard HR Hahnloser, and  
634 Michale S Fee. Rhythmic continuous-time coding in the songbird analog of vocal motor  
635 cortex. *Neuron*, 90(4):877–892, 2016.
- 636 [11] Michel A Picardo, Josh Merel, Kalman A Katlowitz, Daniela Vallentin, Daniel E Okobi,  
637 Sam E Benezra, Rachel C Clary, Eftychios A Pnevmatikakis, Liam Paninski, and Michael A  
638 Long. Population-level representation of a temporal sequence underlying song production  
639 in the zebra finch. *Neuron*, 90(4):866–876, 2016.
- 640 [12] Michael A Long and Michale S Fee. Using temperature to analyse temporal dynamics in  
641 the songbird motor pathway. *Nature*, 456(7219):189, 2008.
- 642 [13] Georg Kosche, Daniela Vallentin, and Michael A Long. Interplay of inhibition and excitation  
643 shapes a premotor neural sequence. *Journal of Neuroscience*, 35(3):1217–1227, 2015.
- 644 [14] Jörgen Kornfeld, Sam E Benezra, Rajeevan T Narayanan, Fabian Svara, Robert Egger,  
645 Marcel Oberlaender, Winfried Denk, and Michael A Long. Em connectomics reveals axonal  
646 target variation in a sequence-generating network. *Elife*, 6:e24364, 2017.
- 647 [15] Dezhe Z Jin, Fethi M Ramazanoğlu, and H Sebastian Seung. Intrinsic bursting enhances  
648 the robustness of a neural network model of sequence generation by avian brain area hvc.  
649 *Journal of computational neuroscience*, 23(3):283, 2007.
- 650 [16] Michale S Fee, Alexay A Kozhevnikov, and Richard Hr Hahnloser. Neural mechanisms of  
651 vocal sequence generation in the songbird. *Annals of the New York Academy of Sciences*,  
652 1016(1):153–170, 2004.
- 653 [17] Ila R Fiete, Richard HR Hahnloser, Michale S Fee, and H Sebastian Seung. Temporal  
654 sparseness of the premotor drive is important for rapid learning in a neural network model  
655 of birdsong. *Journal of neurophysiology*, 92(4):2274–2282, 2004.
- 656 [18] Bence P Ölveczky, Aaron S Andalman, and Michale S Fee. Vocal experimentation in the  
657 juvenile songbird requires a basal ganglia circuit. *PLoS biology*, 3(5):e153, 2005.

- 658 [19] Michale S Fee and Jesse H Goldberg. A hypothesis for basal ganglia-dependent reinforce-  
659 ment learning in the songbird. *Neuroscience*, 198:152–170, 2011.
- 660 [20] Kathy W Nordeen and Ernest J Nordeen. Projection neurons within a vocal motor pathway  
661 are born during song learning in zebra finches. *Nature*, 334(6178):149, 1988.
- 662 [21] Arturo Alvarez-Buylla, Marga Theelen, and Fernando Nottebohm. Birth of projection  
663 neurons in the higher vocal center of the canary forebrain before, during, and after song  
664 learning. *Proceedings of the National Academy of Sciences*, 85(22):8722–8726, 1988.
- 665 [22] Benjamin B Scott and Carlos Lois. Developmental origin and identity of song system neu-  
666 rons born during vocal learning in songbirds. *Journal of Comparative Neurology*, 502(2):202–  
667 214, 2007.
- 668 [23] John R Kirn. The relationship of neurogenesis and growth of brain regions to song learning.  
669 *Brain and language*, 115(1):29–44, 2010.
- 670 [24] Sarah W Bottjer, Elizabeth A Miesner, and Arthur P Arnold. Changes in neuronal num-  
671 ber, density and size account for increases in volume of song-control nuclei during song  
672 development in zebra finches. *Neuroscience letters*, 67(3):263–268, 1986.
- 673 [25] Joseph K Jun and Dezhe Z Jin. Development of neural circuitry for precise temporal  
674 sequences through spontaneous activity, axon remodeling, and synaptic plasticity. *PLoS*  
675 *One*, 2(8):e723, 2007.
- 676 [26] Aaron Miller and Dezhe Z Jin. Potentiation decay of synapses and length distributions of  
677 synfire chains self-organized in recurrent neural networks. *Physical Review E*, 88(6):062716,  
678 2013.
- 679 [27] Tatsuo S Okubo, Emily L Mackevicius, Hannah L Payne, Galen F Lynch, and Michale S  
680 Fee. Growth and splitting of neural sequences in songbird vocal development. *Nature*,  
681 528(7582):352, 2015.

- 682 [28] Linda Wilbrecht and John R Kirn. Neuron addition and loss in the song system: regulation  
683 and function. *Annals of the New York Academy of Sciences*, 1016(1):659–683, 2004.
- 684 [29] Robert Egger, Yevhen Tupikov, K. A. Katlowitz, S. E. Benezra, M. A. Picardo, F. Moll,  
685 J. Kornfeld, D. Z. Jin, and M. A. Long. Local axonal conduction delays underlie precise  
686 timing of a neural sequence. *bioRxiv*, page doi: <https://doi.org/10.1101/864231>, 2019.
- 687 [30] David A McCormick and David A Prince. Post-natal development of electrophysiological  
688 properties of rat cerebral cortical pyramidal neurones. *The Journal of physiology*,  
689 393(1):743–762, 1987.
- 690 [31] Zhong-wei Zhang. Maturation of layer v pyramidal neurons in the rat prefrontal cortex:  
691 intrinsic properties and synaptic function. *Journal of neurophysiology*, 91(3):1171–1182,  
692 2004.
- 693 [32] Anne-Marie M Oswald and Alex D Reyes. Maturation of intrinsic and synaptic properties  
694 of layer 2/3 pyramidal neurons in mouse auditory cortex. *Journal of neurophysiology*,  
695 99(6):2998–3008, 2008.
- 696 [33] Matthew T Ross, Diana Flores, Richard Bertram, Frank Johnson, and Richard L Hyson.  
697 Neuronal intrinsic physiology changes during development of a learned behavior. *eneuro*,  
698 4(5), 2017.
- 699 [34] Clay O Lacefield, Vladimir Itskov, Thomas Reardon, René Hen, and Joshua A Gordon.  
700 Effects of adult-generated granule cells on coordinated network activity in the dentate  
701 gyrus. *Hippocampus*, 22(1):106–116, 2012.
- 702 [35] Nohjin Kee, Cátia M Teixeira, Afra H Wang, and Paul W Frankland. Preferential incorpo-  
703 ration of adult-generated granule cells into spatial memory networks in the dentate gyrus.  
704 *Nature neuroscience*, 10(3):355, 2007.
- 705 [36] Dezhe Z Jin. Generating variable birdsong syllable sequences with branching chain networks  
706 in avian premotor nucleus hvc. *Physical Review E*, 80(5):051902, 2009.

- 707 [37] Constance Scharff, John R Kirn, Matthew Grossman, Jeffrey D Macklis, and Fernando  
708 Nottebohm. Targeted neuronal death affects neuronal replacement and vocal behavior in  
709 adult songbirds. *Neuron*, 25(2):481–492, 2000.
- 710 [38] Richard Mooney and Jonathan F Prather. The hvc microcircuit: the synaptic basis for  
711 interactions between song motor and vocal plasticity pathways. *Journal of Neuroscience*,  
712 25(8):1952–1964, 2005.
- 713 [39] Niangui Wang, Patrick Hurley, Carolyn Pytte, and John R Kirn. Vocal control neuron incor-  
714 poration decreases with age in the adult zebra finch. *Journal of Neuroscience*, 22(24):10864–  
715 10870, 2002.
- 716 [40] Guo-qiang Bi and Mu-ming Poo. Synaptic modifications in cultured hippocampal neurons:  
717 dependence on spike timing, synaptic strength, and postsynaptic cell type. *Journal of*  
718 *neuroscience*, 18(24):10464–10472, 1998.
- 719 [41] Geoffrey A Kerchner and Roger A Nicoll. Silent synapses and the emergence of a postsy-  
720 naptic mechanism for ltp. *Nature Reviews Neuroscience*, 9(11):813, 2008.
- 721 [42] Tatsuo S Okubo, Emily L Mackevicius, Hannah L Payne, Galen F Lynch, and  
722 Michale S Fee. Single-unit extracellular recordings of projection neurons in the pre-  
723 motor cortical area hvc of juvenile male zebra finches during singing. CRCNS.org,  
724 <http://dx.doi.org/10.6080/K01N7Z2Z>, (2016).
- 725 [43] Chunmei Zhao, E Matthew Teng, Robert G Summers, Guo-li Ming, and Fred H Gage.  
726 Distinct morphological stages of dentate granule neuron maturation in the adult mouse  
727 hippocampus. *Journal of Neuroscience*, 26(1):3–11, 2006.
- 728 [44] Moshe Abeles. *Local cortical circuits: Studies of brain function*, 1982.
- 729 [45] Moshe Abeles. *Corticonics: Neural circuits of the cerebral cortex*. Cambridge University  
730 Press, 1991.

- 731 [46] Yehezkel Ben-Ari, Jean-Luc Gaiarsa, Roman Tyzio, and Rustem Khazipov. Gaba: a pioneer  
732 transmitter that excites immature neurons and generates primitive oscillations. *Physiolog-*  
733 *ical reviews*, 87(4):1215–1284, 2007.
- 734 [47] Verónica C Piatti, M Georgina Davies-Sala, M Soledad Espósito, Lucas A Mongiat,  
735 Mariela F Trincherro, and Alejandro F Schinder. The timing for neuronal maturation in  
736 the adult hippocampus is modulated by local network activity. *Journal of Neuroscience*,  
737 31(21):7715–7728, 2011.
- 738 [48] Arturo Alvarez-Buylla, Chang-Ying Ling, and Fernando Nottebohm. High vocal center  
739 growth and its relation to neurogenesis, neuronal replacement and song acquisition in ju-  
740 venile canaries. *Journal of neurobiology*, 23(4):396–406, 1992.
- 741 [49] Michael J Burek, Kathy W Nordeen, and Ernest J Nordeen. Neuron loss and addition  
742 in developing zebra finch song nuclei are independent of auditory experience during song  
743 learning. *Journal of neurobiology*, 22(3):215–223, 1991.
- 744 [50] Linda Wilbrecht, Alex Crionas, and Fernando Nottebohm. Experience affects recruitment  
745 of new neurons but not adult neuron number. *Journal of Neuroscience*, 22(3):825–831,  
746 2002.
- 747 [51] Markus Diesmann, Marc-Oliver Gewaltig, and Ad Aertsen. Stable propagation of syn-  
748 chronous spiking in cortical neural networks. *Nature*, 402(6761):529, 1999.
- 749 [52] Ila R Fiete, Walter Senn, Claude ZH Wang, and Richard HR Hahnloser. Spike-time-  
750 dependent plasticity and heterosynaptic competition organize networks to produce long  
751 scale-free sequences of neural activity. *Neuron*, 65(4):563–576, 2010.
- 752 [53] Eugene M Izhikevich. Polychronization: computation with spikes. *Neural computation*,  
753 18(2):245–282, 2006.



- 754 [54] Leif Gibb, Timothy Q Gentner, and Henry DI Abarbanel. Inhibition and recurrent exci-  
755 tation in a computational model of sparse bursting in song nucleus hvc. *Journal of neuro-*  
756 *physiology*, 2009.
- 757 [55] Natalia Caporale and Yang Dan. Spike timing-dependent plasticity: a hebbian learning  
758 rule. *Annu. Rev. Neurosci.*, 31:25–46, 2008.
- 759 [56] Robert C Froemke and Yang Dan. Spike-timing-dependent synaptic modification induced  
760 by natural spike trains. *Nature*, 416(6879):433, 2002.
- 761 [57] Baktash Babadi and Larry F Abbott. Intrinsic stability of temporally shifted spike-timing  
762 dependent plasticity. *PLoS computational biology*, 6(11):e1000961, 2010.
- 763 [58] Álvaro González. Measurement of areas on a sphere using fibonacci and latitude-longitude  
764 lattices. *Mathematical Geosciences*, 42(1):49, 2010.
- 765 [59] Sam E Benezra, Rajeevan T Narayanan, Robert Egger, Marcel Oberlaender, and Michael A  
766 Long. Morphological characterization of hvc projection neurons in the zebra finch (*taeniopy-*  
767 *gia guttata*). *Journal of Comparative Neurology*, 526(10):1673–1689, 2018.
- 768 [60] Peter J Prince and John R Dormand. High order embedded runge-kutta formulae. *Journal*  
769 *of Computational and Applied Mathematics*, 7(1):67–75, 1981.
- 770 [61] Kristian Debrabant. Runge-kutta methods for third order weak approximation of sdes with  
771 multidimensional additive noise. *BIT Numerical Mathematics*, 50(3):541–558, 2010.
- 772 [62] Vladimir Batagelj and Andrej Mrvar. Pajek—analysis and visualization of large networks.  
773 In *Graph drawing software*, pages 77–103. Springer, 2004.

## 774 Figures

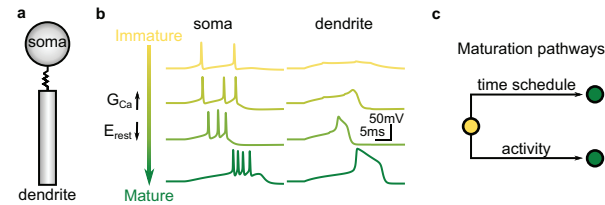

Figure 1: Computational model of HVC<sub>RA</sub> neurons and the maturation process. (a) An HVC<sub>RA</sub> neuron is modeled as two-compartmental Hodgkin-Huxley with soma and dendrite. (b) HVC<sub>RA</sub> responses to the current injection to the dendrital compartment at different maturation stages. (c) Two pathways for neuronal maturation: scheduled maturation under spontaneous activity, and accelerated maturation driven by activity when neuron spikes reliably.

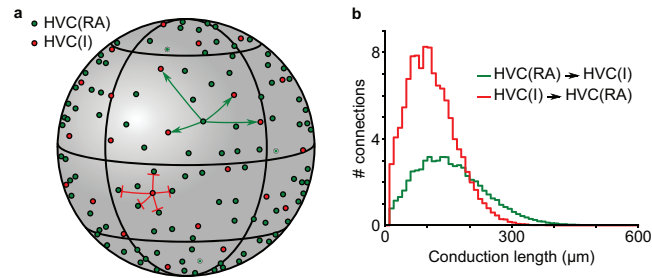

Figure 2: Schematic of a network arrangement and connectivity. **(a)** HVC<sub>RA</sub> (dark green circles) and HVC<sub>INT</sub> (red circles) neurons are distributed over the surface of a sphere. HVC<sub>INT</sub> neurons form a lattice-like pattern, while HVC<sub>RA</sub> neurons are distributed uniformly. Examples of connections from one HVC<sub>RA</sub> neuron to HVC<sub>INT</sub> neurons and from one HVC<sub>INT</sub> to HVC<sub>RA</sub> neurons are shown. **(b)** Distribution of axonal conduction lengths for connections between HVC<sub>RA</sub> and HVC<sub>INT</sub> neurons.

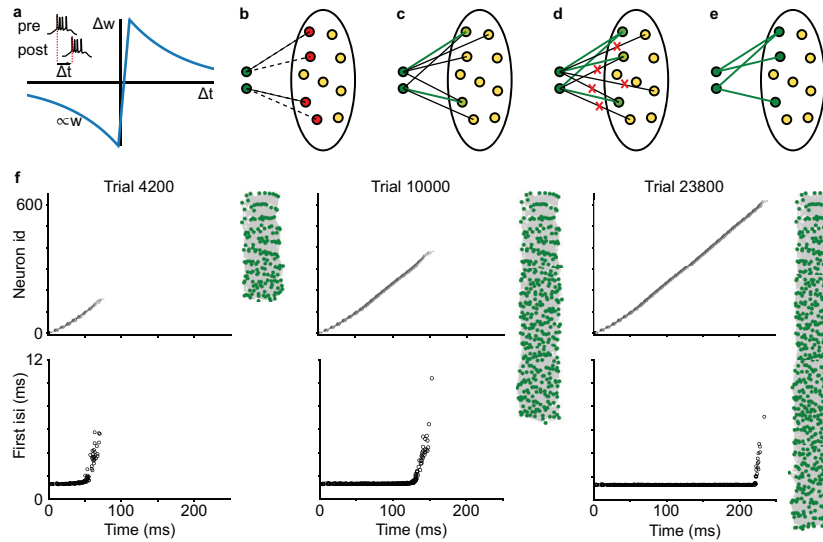

Figure 3: Mechanism of network growth. **(a)** Burst-timing dependent plasticity (BTDP) rule is based on the timing between burst onsets of  $HVC_{RA}$  neurons. **(b-e)** Schematic of recruitment mechanism. **(b)** Network growth begins with the starter neurons (dark green circles) activated each simulation trial and other  $HVC_{RA}$  neurons being immature (yellow circles). Silent connections (dashed lines) emerge from starter neurons to spontaneously active immature  $HVC_{RA}$  (red circles) according to the BTDP rule. **(c)** Some silent connections randomly become active (black lines), undergo further strengthening and become strong super connections (thick green lines). **(d)** When the starter neurons acquire certain number of strong super connections, other weak connections are pruned (red crosses). **(e)** The recruited neurons (dark green circles) spike reliably after the starter neurons and begin to recruit new neurons to the network. **(f)** Network growth is a gradual process in which immature  $HVC_{RA}$  neurons are added to the end of the sequence. Spike raster plots (top row) and first interspike intervals (bottom row) at different trials of the simulation are shown. Also shown are the network topology, in which green dots are neurons in the synaptic chain network and gray lines and the connections between neurons. The green dots on top are the starter neurons, and the those at the bottom are the newly recruited neurons.

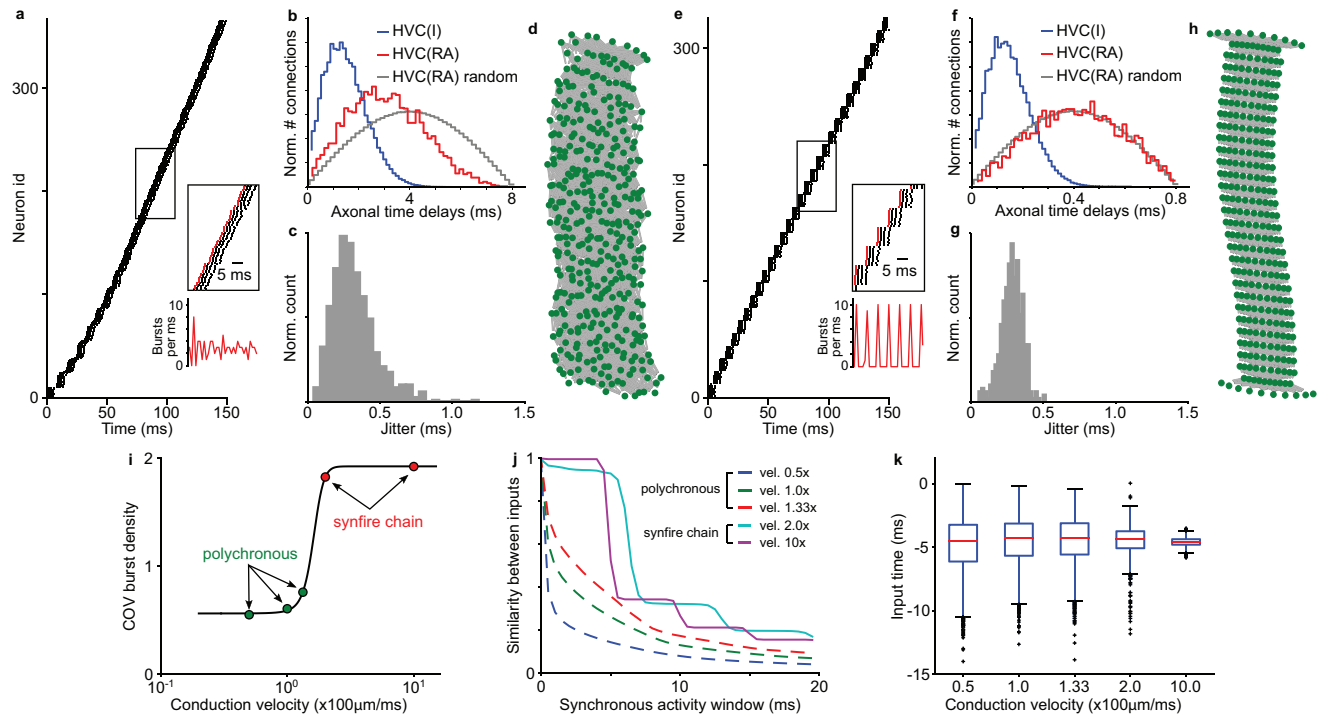

Figure 4: Conduction velocity shapes network topology. **(a-d)** Results for a network with conduction velocity  $100 \mu\text{m/ms}$ , which corresponds to the realistic axonal delays in HVC. **(a)** Raster plot of the first 150 ms of dynamics shows continuous coverage of burst onset times. **(b)** Axonal time delay distributions for efferent  $\text{HVC}_{\text{RA}}$  neuron connections to  $\text{HVC}_{\text{INT}}$  neurons (blue), formed connections to other  $\text{HVC}_{\text{RA}}$  neurons (red), and random connections to  $\text{HVC}_{\text{RA}}$  neurons (grey). Emerged connections show decrease in the number of long delay connections compared to the random connections. **(c)** Jitter in burst onset times of a grown network. **(d)** Network topology. Green dots are  $\text{HVC}_{\text{RA}}$  neurons, and the gray lines are the connections. Neurons on top are the starter neurons. Only neurons with burst onset times within first 150 ms are shown. The network has no apparent grouping of neurons. **(e-g)** Results for a network with 10x faster conduction velocity  $1000 \mu\text{m/ms}$ , which leads to near zero axonal delays. **(e)** Network dynamics has prominent synchronous oscillatory activity. **(f)** No bias towards shorter delay connections is observed in the grown network. **(g)** Network precision is in sub-millisecond range. **(h)** Network topology reveals groups of neurons with similar input and output connections, i.e. synfire chain layers. **(i)** Coefficient of variation of burst onset density shows transition from continuous to discrete activity pattern. **(j)** Similarity of inputs for neurons bursting within synchronous activity window has plateaus for synfire chain networks and is smooth for continuous networks. **(k)** Distributions of excitatory input times relative to burst onset time of postsynaptic neurons for different conduction velocities.

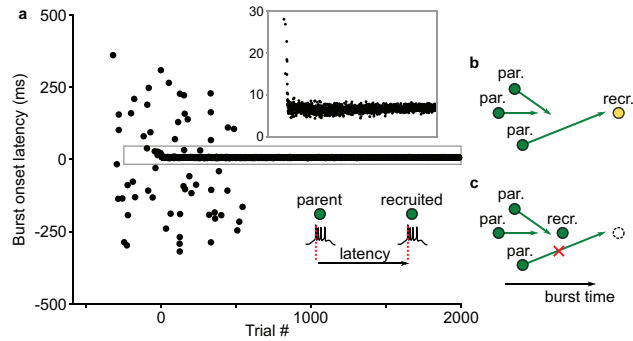

Figure 5: Decrease in burst onset latency of recruited neurons leads to pruning of long delay connections. (a) Burst onset latency between parent and recruited neurons decreases during recruitment. (b-c) Mechanism for pruning long delay connections. (b) A neuron being recruited initially spikes at a large latency, which allows long delay connections to emerge. (c) After recruitment, the neuron spikes at a shorter latency, which makes long delay connections to arrive late and be pruned via LTD.

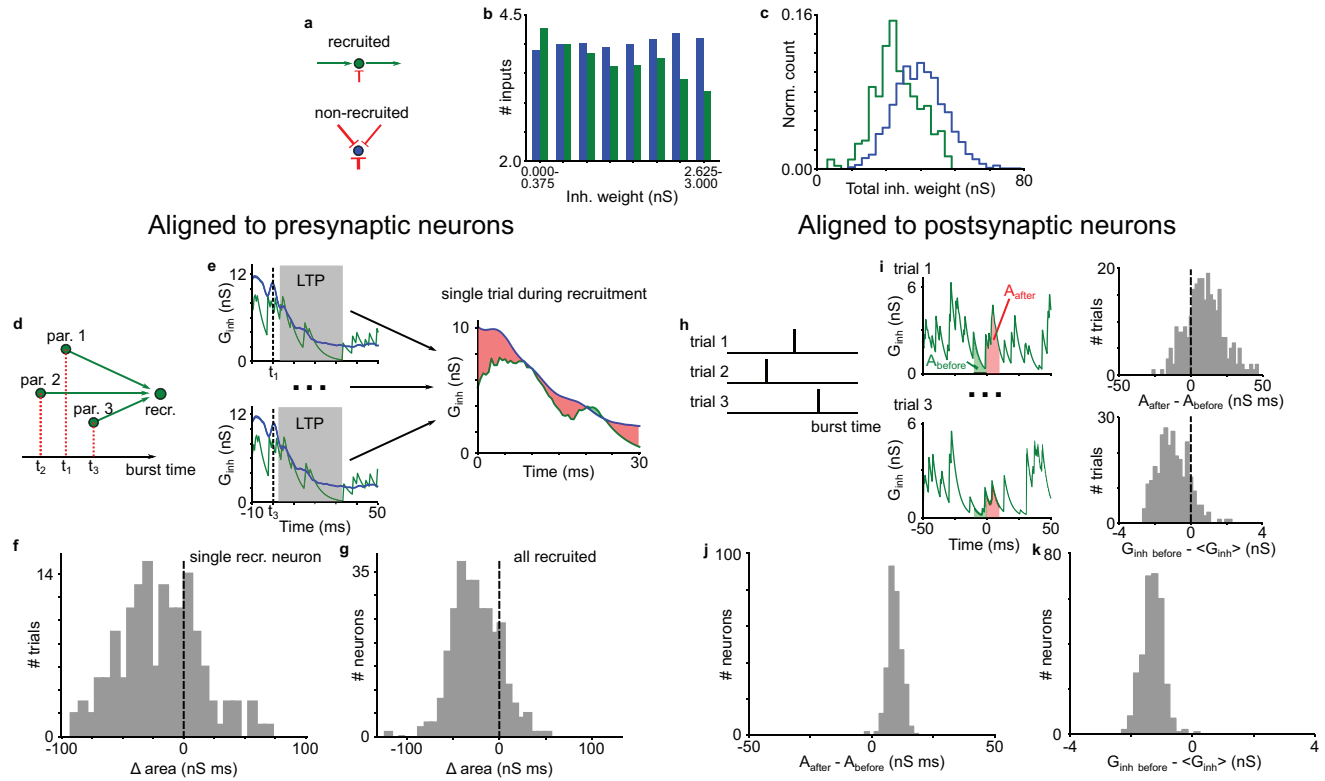

Figure 6: The role of inhibition in network growth. (a-c) Comparison of inhibitory weights onto recruited and non-recruited neurons. (a) Recruited neurons (green circles) receive strong excitation and weak inhibition. Non-recruited neurons (blue circles) receive strong inhibition. (b) Histogram of inhibitory weights shows stronger connections onto non-recruited (blue bars), compared to recruited (green bars) neurons. (c) Distribution of total inhibitory weights for non-recruited neurons (blue) is shifted towards stronger inhibition, compared to recruited neurons (green). (d-g) Comparison of inhibitory conductance aligned to presynaptic neurons during recruitment. (d) Inhibitory conductance is aligned to the burst onset times of presynaptic parent neurons. (e) Inhibitory conductance in the LTP window is averaged across all parent neurons at each trial during recruitment and compared between recruited and non-recruited neurons using the area under the conductance curve. (e) Difference in the area under the conductance curve for a single recruited neuron. (e) Difference in the area under the conductance curve for all recruited neurons. (h-k) Comparison of inhibitory conductance aligned to postsynaptic neurons during recruitment. (h) Burst times of a neuron being recruited at different simulation trials. (i) Inhibitory conductance is aligned to the burst onset times of recruited neurons. Difference in inhibitory conductance after and before burst is calculated using area under the conductance curve. Inhibitory conductance before burst is also compared to the mean inhibitory conductance during the trial. (j) Difference in inhibitory conductance after and before burst for all recruited neurons. (k) Difference in inhibitory conductance before burst and mean inhibitory conductance for all recruited neurons.

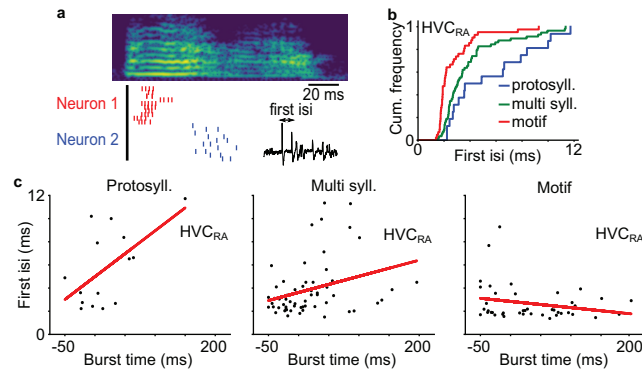

Figure 7: Burst tightness of HVC<sub>RA</sub> neurons at different stages of songbird vocal development. (a) Example of spike patterns of two HVC<sub>RA</sub> neurons in the protosyllable stage aligned to a syllable onset. (b) Cumulative distributions of first interspike intervals of HVC<sub>RA</sub> neurons. (c) First interspike intervals of HVC<sub>RA</sub> neurons at protosyllable, multi syllable and motif stages.

## 775 Supplementary Figures

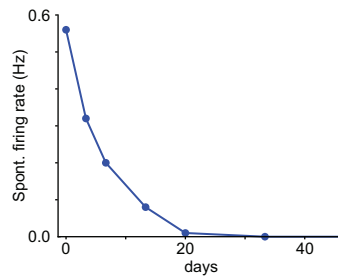

Figure 8: In the model, spontaneous firing rate of HVC<sub>RA</sub> neuron decreases with neuronal age due to reduced excitability.



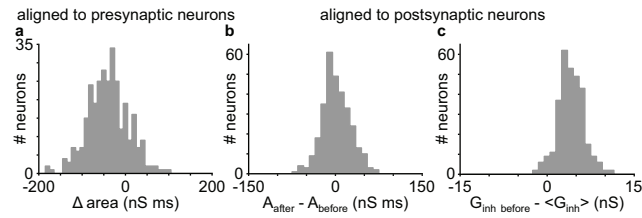

Figure 9: Comparison of inhibitory conductance for a grown network based on 100 test trials. (a) Difference in the area under the conductance curve in the LTP window for all recruited neurons aligned to presynaptic parents. (b-c) Analysis of inhibitory conductance of recruited neurons aligned postsynaptically. (b) Difference in inhibitory conductance after and before burst for all recruited neurons. (c) Difference in inhibitory conductance before burst and mean inhibitory conductance for all recruited neurons.

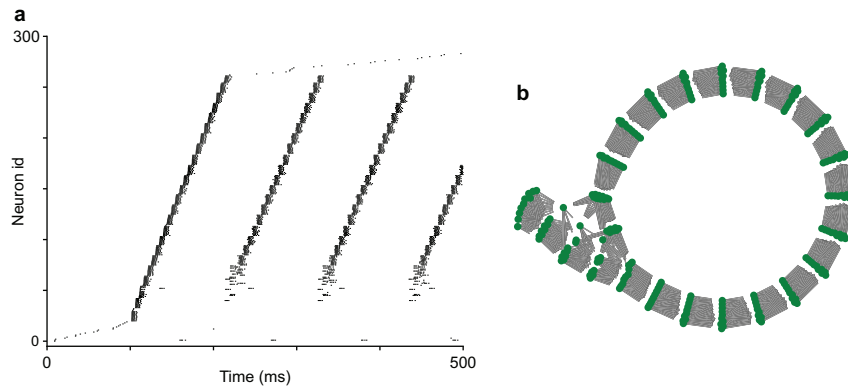

Figure 10: Loop formation in the network with noisy mature  $HVC_{RA}$  neurons. When we use a single population of mature spontaneously active  $HVC_{RA}$  neurons receiving a large white noise stimulus of amplitude 0.25 nA to soma and 0.5 nA to dendrite, loop sequences form. Here we use a fast conduction velocity  $1000 \mu\text{m}/\text{ms}$ , which leads to the emergence of a synfire chain. (a) Raster plot of network dynamics. (b) Network topology based on synaptic weights between neurons.

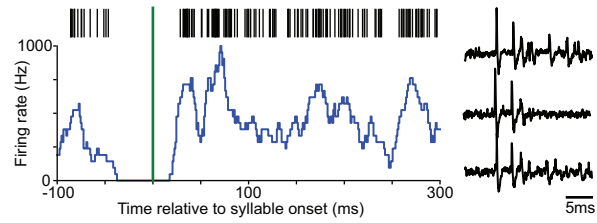

Figure 11: Example  $HVC_{RA}$  neuron recorded in the subsong stage showing tight burst without being locked to the song. (Left) Firing rate of the neuron aligned to syllable onset times does not show significant peak, meaning that the neuron is not locked to the syllables. (Right) Example membrane potential traces of the same neuron demonstrate tight bursting pattern.
